# Supplementary material for: The Effects of Plasma-Activated Water on Heavy Metals Accumulation in Water Spinach
Source: MDPI journal article supplement (doi:10.3390/app11115304), 2021-06-07
Supplement: s1 [file s1]

*Supplementary*

**Table 1.** The physiochemical properties of PAW under different treatment time

| <b>Treatment time<br/>(min)</b> | <b>Nitrate (mg/L)</b> | <b>Nitrite (mg/L)</b> | <b>pH</b>       | <b>Conductivity (<math>\mu</math>S/cm)</b> | <b>ORP (mV)</b> |
|---------------------------------|-----------------------|-----------------------|-----------------|--------------------------------------------|-----------------|
| 0                               | $0.70 \pm 0.15$       | $0.00 \pm 0.00$       | $6.99 \pm 0.01$ | $83.6 \pm 0.61$                            | $369 \pm 6.56$  |
| 5                               | $13.8 \pm 0.15$       | $10.3 \pm 0.58$       | $6.79 \pm 0.18$ | $104.9 \pm 22.55$                          | $370 \pm 7.51$  |
| 10                              | $29.8 \pm 1.67$       | $17.3 \pm 1.15$       | $4.22 \pm 0.07$ | $117.9 \pm 2.80$                           | $465 \pm 9.29$  |
| 15                              | $33.3 \pm 0.87$       | $13.0 \pm 1.00$       | $3.37 \pm 0.06$ | $208.3 \pm 6.51$                           | $534 \pm 13.0$  |
| 20                              | $42.7 \pm 0.70$       | $14.7 \pm 0.58$       | $3.17 \pm 0.06$ | $311.7 \pm 12.01$                          | $554 \pm 2.65$  |

Note: The analysis was carried out in triplicates (n=3).

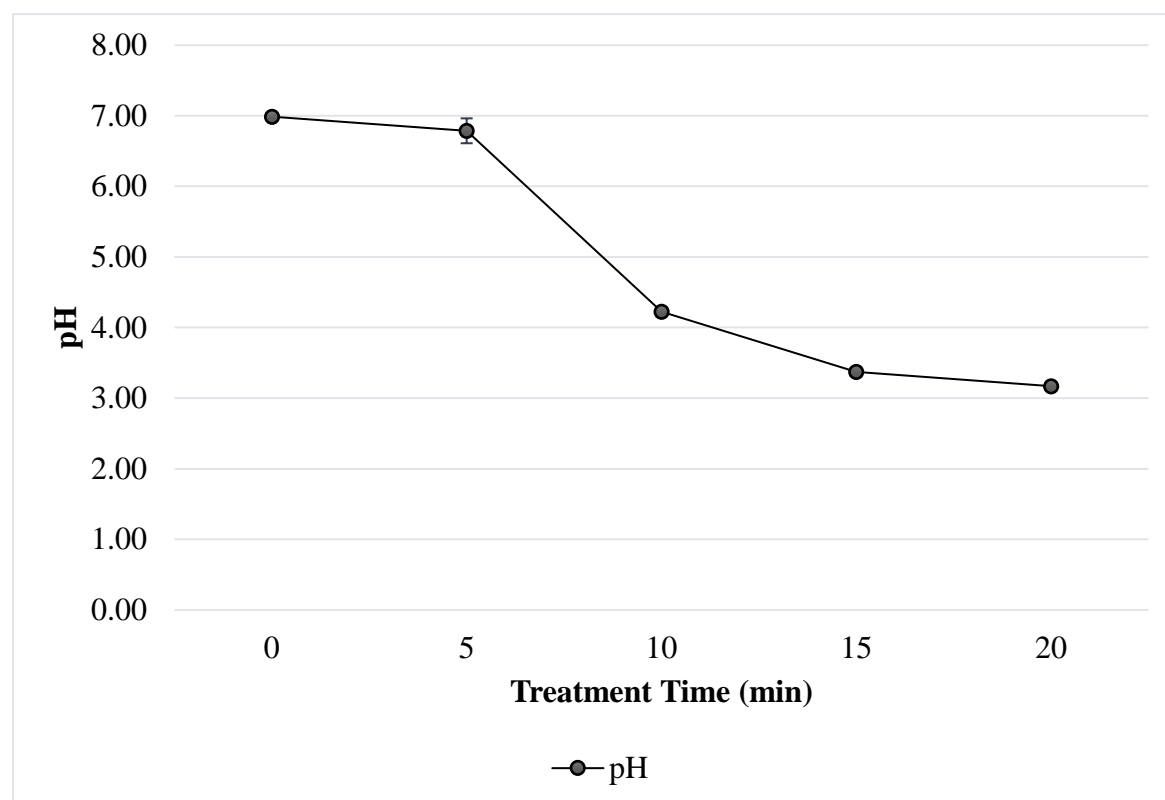

**Figure S1.** The pH values of PAW under different treatment time (n=3 in each group)

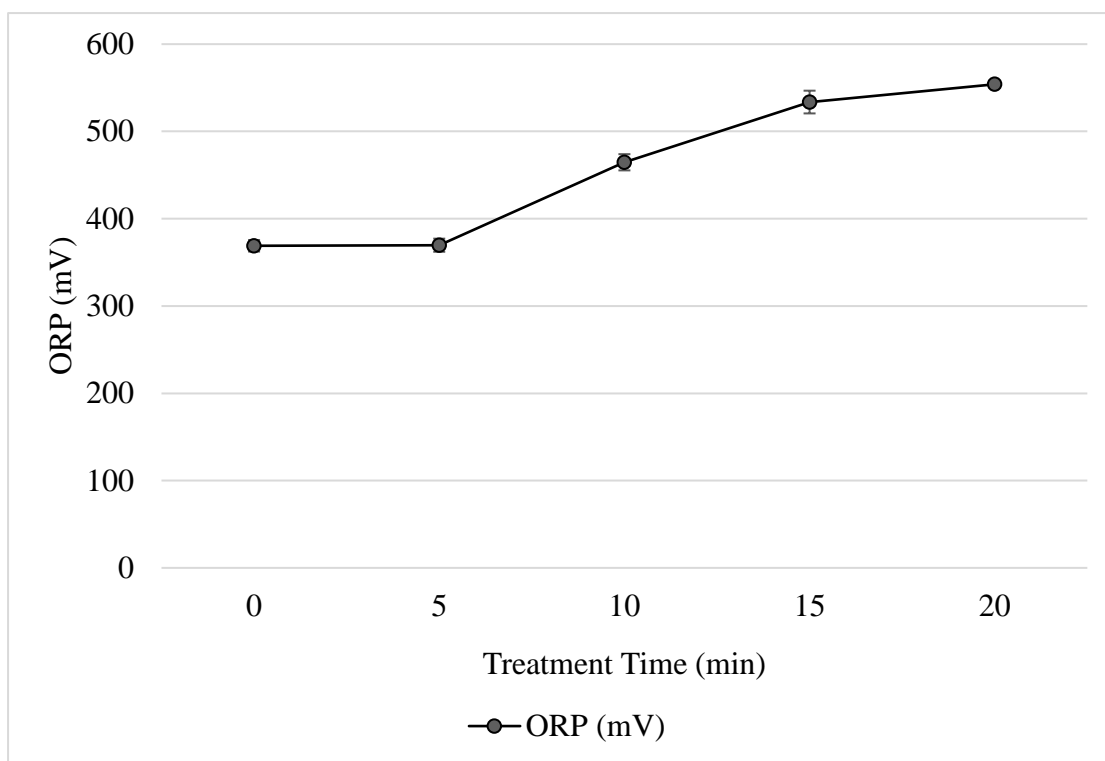

**Figure S1.** The ORP values of PAW under different treatment time (n=3 in each group)

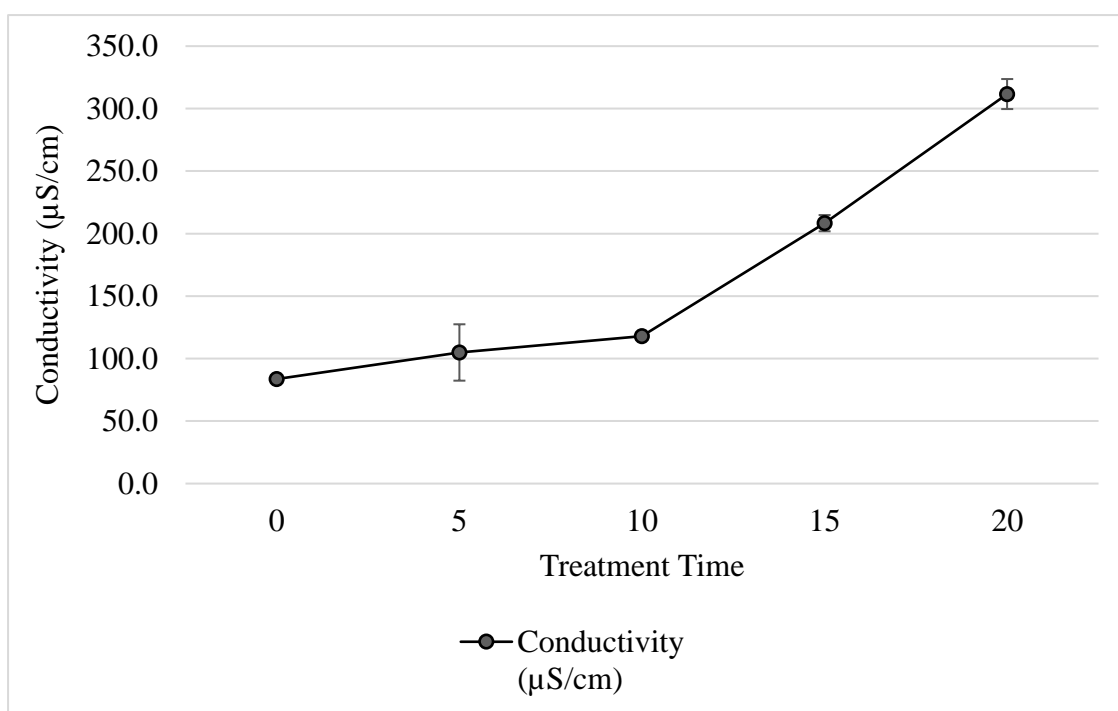

**Figure S2.** The electrical conductivity of PAW under different treatment time (n=3 in each group)

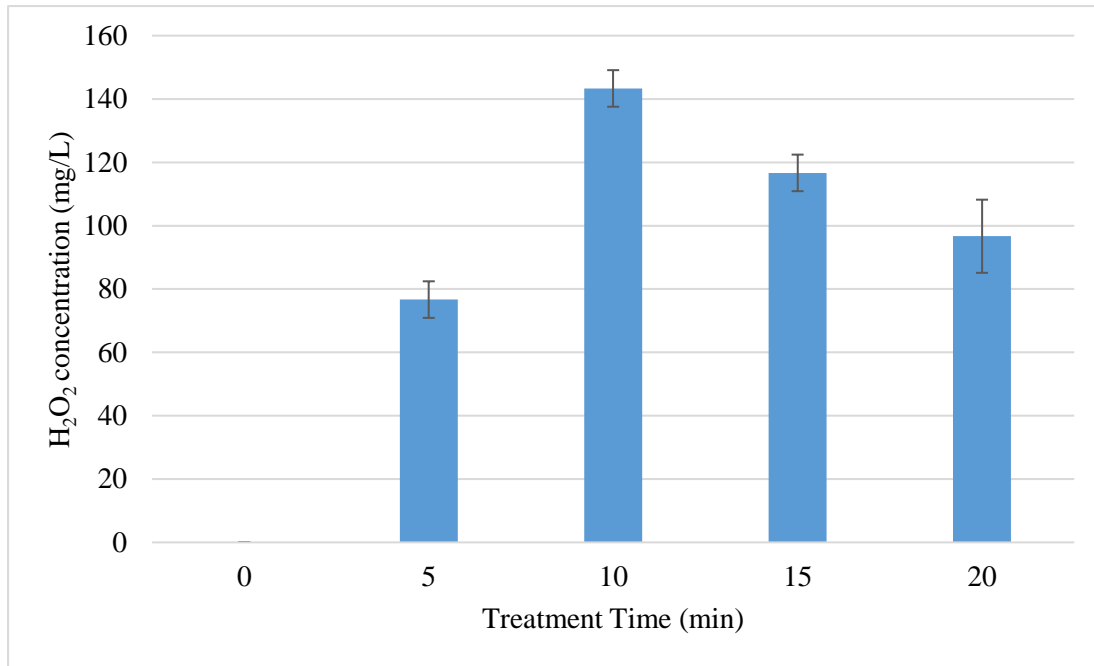

**Figure S4.** Concentration of  $H_2O_2$  produced in PAW at different treatment time (N=3 for each group)

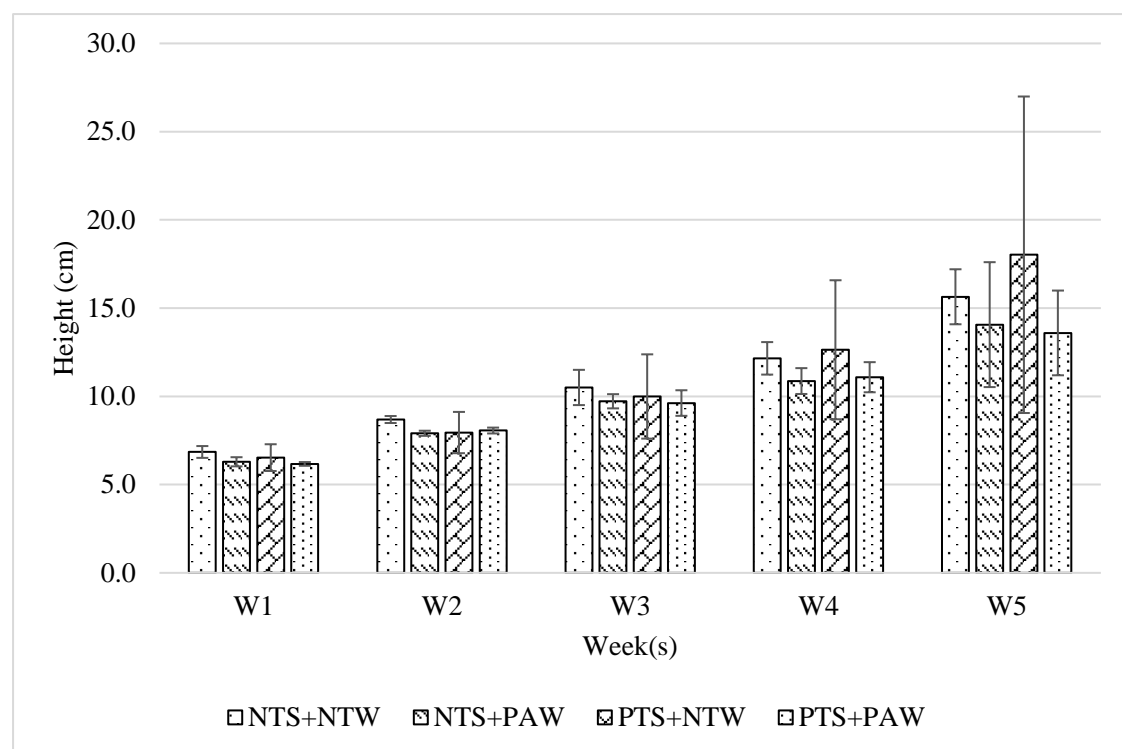

**Figure S5.** The average height of water spinach planted in Cd-added soil under different treatments

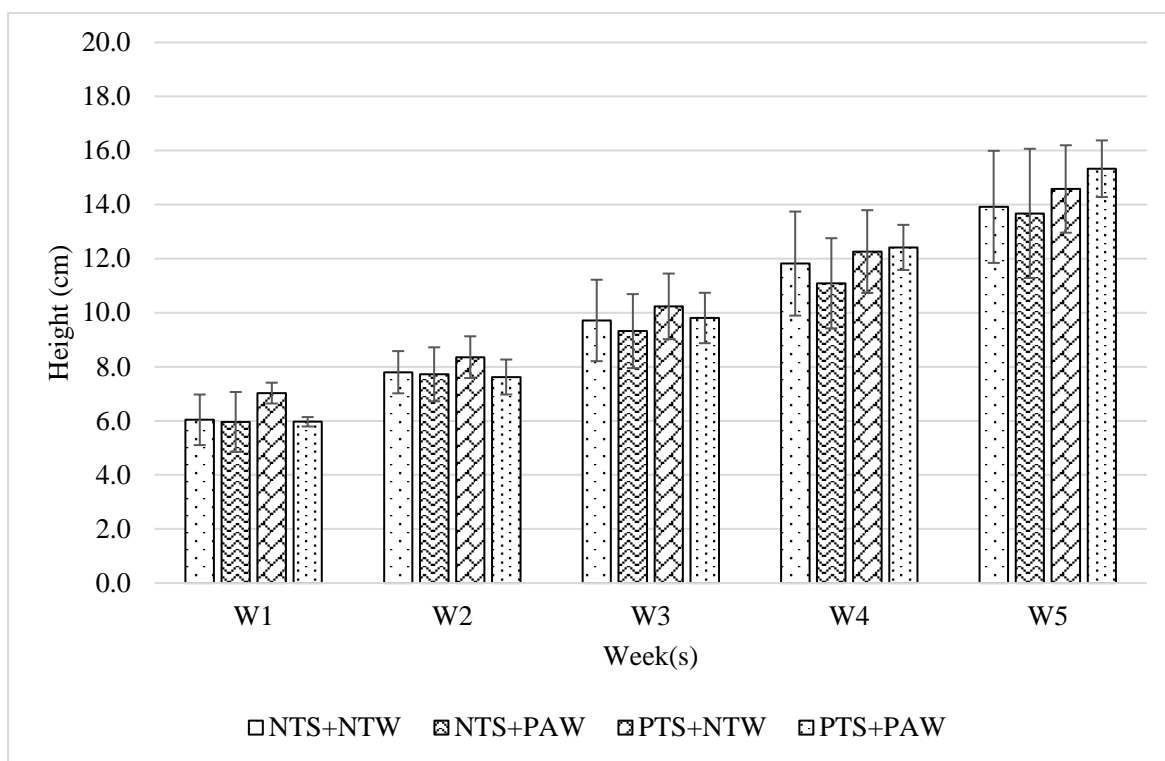

**Figure S6.** The average height of water spinach planted in Pb-added soil under different treatments

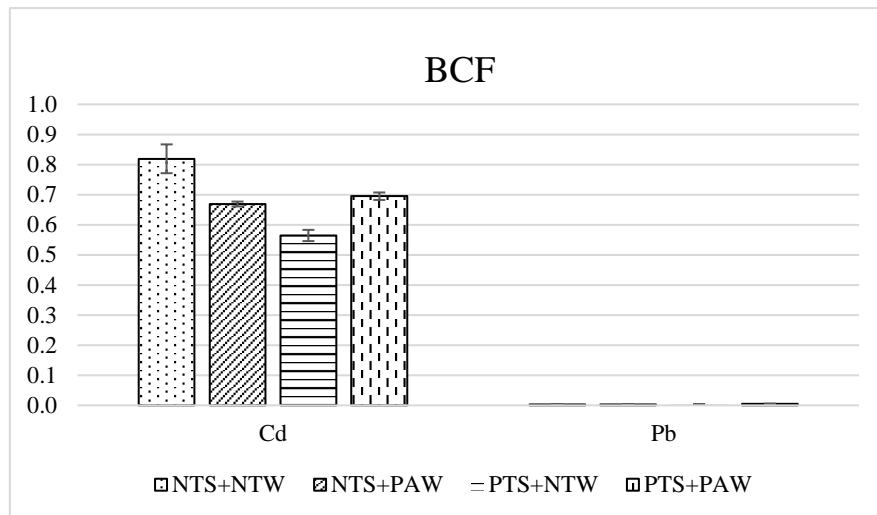

**Figure S7.** Bioconcentration factors of Cd and Pb in water spinach
